# Supplementary material for: Reorientation dynamics and ion diffusivity of neat dimethylimidazolium dimethylphosphate probed by NMR spectroscopy
Source: PubMed Central journal article supplement (PMC9074696; doi:10.1039/c9ra07731f), 2019-11-04
Supplement: RA-009-C9RA07731F-s001.pdf [file RA-009-C9RA07731F-s001.pdf]

**Reorientation dynamics and ion diffusivity of neat dimethylimidazolium dimethylphosphate  
probed by NMR spectroscopy**

Christoph Wiedemann<sup>1,\*</sup>, Günter Hempel<sup>2</sup> and Frank Bordusa<sup>1,\*</sup>

<sup>1</sup>Institute of Biochemistry and Biotechnology, Charles Tanford Protein Center, Martin Luther University Halle-  
Wittenberg, Kurt-Mothes-Str. 3a, D-06120 Halle (Saale), Germany

<sup>2</sup>Institute of Physics, Martin Luther University Halle-Wittenberg, Betty-Heimann-Str. 7, D-06120 Halle (Saale),  
Germany

\*Corresponding author: christoph.wiedemann@biochemtech.uni-halle.de, frank.bordusa@biochemtech.uni-halle.de

Supplementary Material

## $^1\text{H}$ and $^{13}\text{C}$ NMR spectrum of $[\text{C}_1\text{C}_1\text{IM}][(\text{CH}_3)_2\text{PO}_4]$

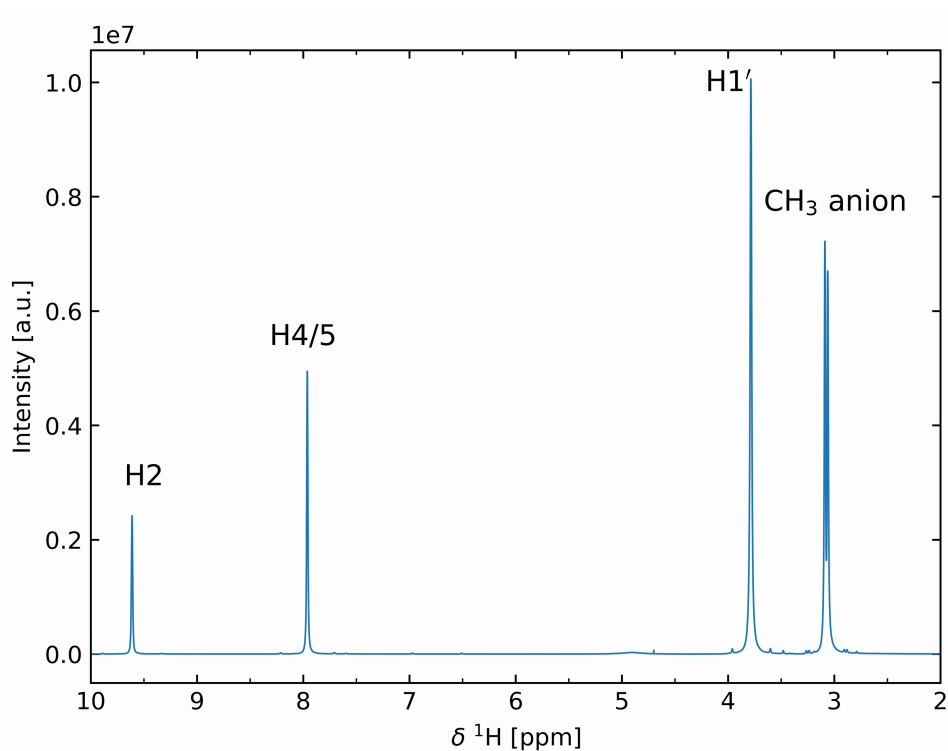

Figure S1:  $^1\text{H}$  NMR spectrum of pure  $[\text{C}_1\text{C}_1\text{IM}][(\text{CH}_3)_2\text{PO}_4]$  measured at 293 K and a magnetic field strength of 16.45 T. Atom numbering as reported in Fig. 1 (s. main text)

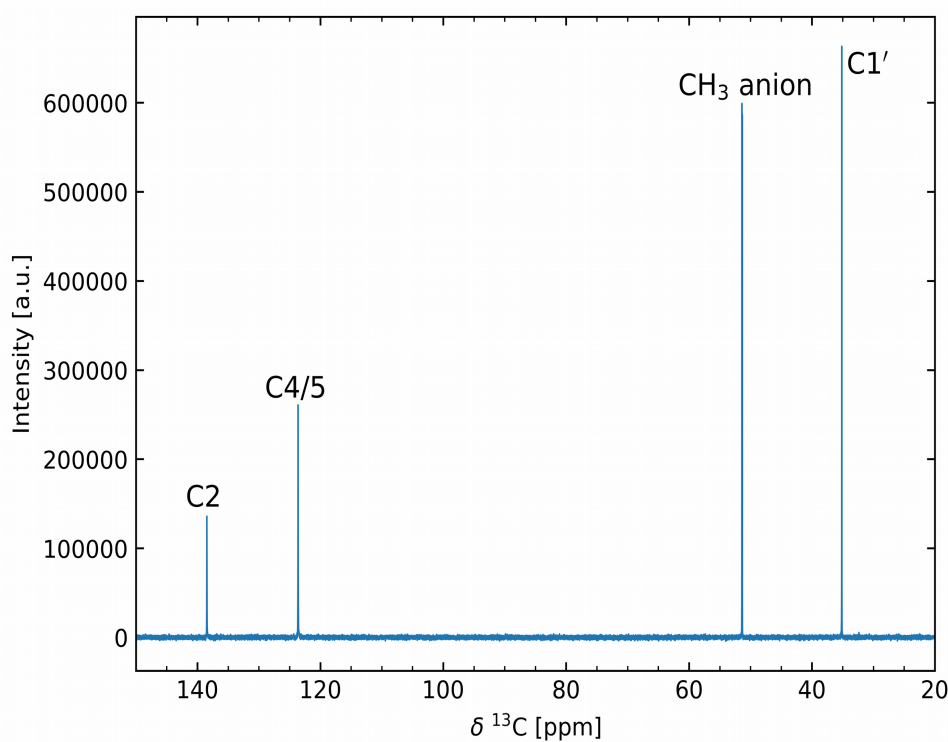

Figure S2:  $^{13}\text{C}$  NMR spectrum of pure  $[\text{C}_1\text{C}_1\text{IM}][(\text{CH}_3)_2\text{PO}_4]$  measured at 293 K and a magnetic field strength of 16.45 T. Atom numbering as reported in Fig. 1 (s. main text)

## Comparison of $^{13}\text{C}$ $T_1$ values and line widths measured with HR-MAS and liquid probes

Table S1: Comparison of the  $^{13}\text{C}$   $T_1$  values (s) of  $[\text{C}_1\text{C}_1\text{IM}][(\text{CH}_3)_2\text{PO}_4]$  between broadband and gated  $^1\text{H}$  decoupling at different temperatures, magnetic field strengths (9.35 T and 16.45 T corresponding to a  $^{13}\text{C}$  resonance frequency of 100.6 MHz and 176.2 MHz, respectively) and probe settings.

|                       | 100 MHz                  |              | 176 MHz                  |              |
|-----------------------|--------------------------|--------------|--------------------------|--------------|
|                       | Broadband/Gated decouple |              | Broadband/Gated decouple |              |
|                       | HR-MAS probe             | liquid probe | HR-MAS probe             | liquid probe |
| C2                    |                          |              |                          |              |
| 278.2 K               | 0.29/0.30                | 0.31/0.32    | 0.52/0.49                | 0.51/0.51    |
| 293.2 K               | 0.23/0.23                | 0.23/0.23    | 0.36/0.37                | 0.35/0.38    |
| 323.2 K               | 0.36/0.36                | 0.38/0.40    | 0.53/0.61                | 0.45/0.47    |
| C4/5                  |                          |              |                          |              |
| 278.2 K               | 0.29/0.28                | 0.30/0.30    | 0.47/0.46                | 0.49/0.47    |
| 293.2 K               | 0.21/0.22                | 0.22/0.22    | 0.33/0.34                | 0.34/0.35    |
| 323.2 K               | 0.31/0.33                | 0.35/0.36    | 0.49/0.55                | 0.40/0.42    |
| C1'                   |                          |              |                          |              |
| 278.2 K               | 1.19/1.24                | 1.29/1.28    | 1.75/1.65                | 1.82/1.75    |
| 293.2 K               | 0.87/0.94                | 0.89/0.89    | 1.33/1.17                | 1.29/1.27    |
| 323.2 K               | 1.04/1.10                | 1.21/1.20    | 1.41/1.48                | 1.37/1.28    |
| CH <sub>3</sub> anion |                          |              |                          |              |
| 278.2 K               | 1.30/1.37                | 1.37/1.33    | 1.65/1.67                | 1.80/1.87    |
| 293.2 K               | 1.53/1.54                | 1.50/1.52    | 1.84/1.87                | 1.80/1.87    |
| 323.2 K               | 2.62/2.62                | 3.07/3.04    | 3.56/3.81                | 3.01/3.02    |

Table S2: The line widths of  $[\text{C}_1\text{C}_1\text{IM}][(\text{CH}_3)_2\text{PO}_4]$   $^{13}\text{C}$  signals at half peak height at 278.2 K, 293.2 K and 323.2 K for different probe types at  $B_0$  of 9.35 T and 16.45 T, respectively ( $^{13}\text{C}$  resonance frequency of 100.6 MHz and 176.2 MHz). Line widths are given in Hz and the errors are less than 1 Hz.

|                       | 100 MHz      |              | 176 MHz      |              |
|-----------------------|--------------|--------------|--------------|--------------|
|                       | HR-MAS probe | liquid probe | HR-MAS probe | liquid probe |
| C2                    |              |              |              |              |
| 278.2 K               | 7            | 7            | 7            | 7            |
| 293.2 K               | 3            | 3            | 4            | 5            |
| 323.2 K               | 2            | 2            | 3            | 2            |
| C4/5                  |              |              |              |              |
| 278.2 K               | 7            | 7            | 7            | 7            |
| 293.2 K               | 3            | 3            | 3            | 3            |
| 323.2 K               | 2            | 2            | 3            | 2            |
| C1'                   |              |              |              |              |
| 278.2 K               | 2            | 2            | 3            | 2            |
| 293.2 K               | 1            | 1            | 1            | 2            |
| 323.2 K               | 1            | 1            | 3            | 1            |
| CH <sub>3</sub> anion |              |              |              |              |
| 278.2 K               | 1            | 2            | 2            | 2            |

|         | 100 MHz      |              | 176 MHz      |              |
|---------|--------------|--------------|--------------|--------------|
|         | HR-MAS probe | liquid probe | HR-MAS probe | liquid probe |
| 293.2 K | 1            | 1            | 1            | 1            |
| 323.2 K | 1            | 1            | 1            | 1            |

## Longitudinal $^{13}\text{C}$ -relaxation times

Table S3:  $^{13}\text{C}$   $T_1$  relaxation times [s] of different carbon groups in  $[\text{C}_1\text{C}_1\text{IM}][(\text{CH}_3)_2\text{PO}_4]$  at  $B_0$  of 9.35 T and 16.45 T

| Temperature [K] | C2      |         | C4/5    |         | C1'     |         | CH <sub>3</sub> anion |         |
|-----------------|---------|---------|---------|---------|---------|---------|-----------------------|---------|
|                 | 100 MHz | 176 MHz | 100 MHz | 176 MHz | 100 MHz | 176 MHz | 100 MHz               | 176 MHz |
| 278.2           | 0.309   | 0.519   | 0.296   | 0.492   | 1.217   | 1.925   | 1.277                 | 1.780   |
| 283.2           | 0.267   | 0.445   | 0.254   | 0.412   | 1.075   | 1.607   | 1.370                 | 1.703   |
| 288.2           | 0.241   | 0.393   | 0.226   | 0.361   | 0.970   | 1.365   | 1.440                 | 1.695   |
| 293.2           | 0.231   | 0.359   | 0.215   | 0.337   | 0.895   | 1.330   | 1.535                 | 1.895   |
| 298.3           | 0.231   | 0.353   | 0.213   | 0.315   | 0.892   | 1.240   | 1.700                 | 1.963   |
| 303.2           | 0.249   | 0.341   | 0.229   | 0.305   | 0.911   | 1.200   | 1.970                 | 2.140   |
| 308.2           | 0.272   | 0.349   | 0.251   | 0.315   | 0.959   | 1.335   | 2.180                 | 2.410   |
| 313.2           | 0.302   | 0.397   | 0.278   | 0.371   | 1.045   | 1.350   | 2.425                 | 2.765   |
| 318.2           | 0.340   | 0.422   | 0.312   | 0.398   | 1.130   | 1.400   | 2.795                 | 2.905   |
| 323.2           | 0.387   | 0.457   | 0.355   | 0.410   | 1.275   | 1.495   | 3.185                 | 3.083   |
| 328.2           | 0.429   | 0.493   | 0.389   | 0.442   | 1.315   | 1.570   | 3.410                 | 3.170   |
| 333.2           | 0.489   | 0.560   | 0.446   | 0.505   | 1.460   | 1.600   | 3.760                 | 3.840   |
| 338.2           | 0.560   | 0.626   | 0.505   | 0.562   | 1.625   | 1.770   | 4.190                 | 4.170   |
| 343.2           | 0.642   | 0.729   | 0.578   | 0.657   | 1.797   | 2.025   | 4.623                 | 4.770   |
| 348.2           | 0.730   | 0.815   | 0.655   | 0.727   | 1.970   | 2.210   | 4.967                 | 5.235   |
| 353.2           | 0.837   | 0.894   | 0.753   | 0.782   | 2.183   | 2.290   | 5.517                 | 5.455   |

## Calculation of $\tau_c$ and $E_{AVFT}$

Table S4: **A)**  $S^2$  calculated in the  $^{13}\text{C}$   $T_1$  minimum according to  $S^2 = \omega_{cl} / (1.87 A_0 T_1^{\min})$  with the maximum point of  $^{13}\text{C}$  relaxation at  $\omega\tau_c = 0.791$  (BPP spectral density function was used).  $\tau_c$  were calculated as proposed in Matveev et al.<sup>1</sup> **B)** Arrhenius approximation of the  $\tau_c$  temperature dependence. **C)** Vogel-Fulcher-Tammann approximation of the  $\tau_c$  temperature dependence. <sup>a</sup>Fast methyl-group rotation was considered by modifying  $S^2$  with the factor 0.11 ( $S^2 = 0.11 S_{\text{Met}}^2$ ). For methyl carbons  $S_{\text{Met}}^2$  is given. Values for relaxation data at 9.35 T and 16.45 T, respectively. <sup>b</sup>Fitted  $S^2$  with a C-H bond length of 1.13 Å

|                       | $S^2$                                             | $\tau_c$ at 298 K (ns)                      |                                            |                       |
|-----------------------|---------------------------------------------------|---------------------------------------------|--------------------------------------------|-----------------------|
| <b>A)</b> C2          | 0.68(0.84 <sup>b</sup> )/0.81(0.99 <sup>b</sup> ) | 1.22/0.98                                   |                                            |                       |
| C4/5                  | 0.74/0.90                                         | 1.22/0.97                                   |                                            |                       |
| C1'                   | 0.55 <sup>a</sup> /0.72 <sup>a</sup>              | 1.22/0.98                                   |                                            |                       |
| CH <sub>3</sub> anion | -/0.45 <sup>a</sup>                               | -/0.31                                      |                                            |                       |
|                       | $E_A$ (kJ mol <sup>-1</sup> )                     | $\tau_0$ (s)                                | $\chi^2_{\text{red}}$                      |                       |
| <b>B)</b> C2          | 35.29/34.83                                       | 4.76e <sup>-16b</sup> /4.74e <sup>-16</sup> | 3.14/2.61                                  |                       |
| C4/5                  | 34.56/30.04                                       | 6.31e <sup>-16</sup> /2.61e <sup>-15</sup>  | 4.39/11.35                                 |                       |
| C1'                   | 32.52/27.34                                       | 1.89e <sup>-15</sup> /9.59e <sup>-15</sup>  | 3.21/11.81                                 |                       |
| CH <sub>3</sub> anion | -/21.50                                           | -/3.69e <sup>-14</sup>                      | -/9.75                                     |                       |
|                       | $E_{VFT}$ (kJ mol <sup>-1</sup> )                 | $T_0$ (K)                                   | $\tau_0$ (s)                               | $\chi^2_{\text{red}}$ |
| <b>C)</b> C2          | 3.04/2.91                                         | 230.61/237.89                               | 4.45e <sup>-12</sup> /3.29e <sup>-12</sup> | 16.11/48.34           |
| C4/5                  | 3.02/6.55                                         | 230.06/189.78                               | 4.76e <sup>-12</sup> /5.54e <sup>-13</sup> | 12.93/6.55            |
| C1'                   | 2.01/3.68                                         | 245.35/217.10                               | 1.46e <sup>-11</sup> /3.79e <sup>-12</sup> | 39.05/12.00           |
| CH <sub>3</sub> anion | -/4.60                                            | -/188.44                                    | -/1.84e <sup>-12</sup>                     | -/5.66                |

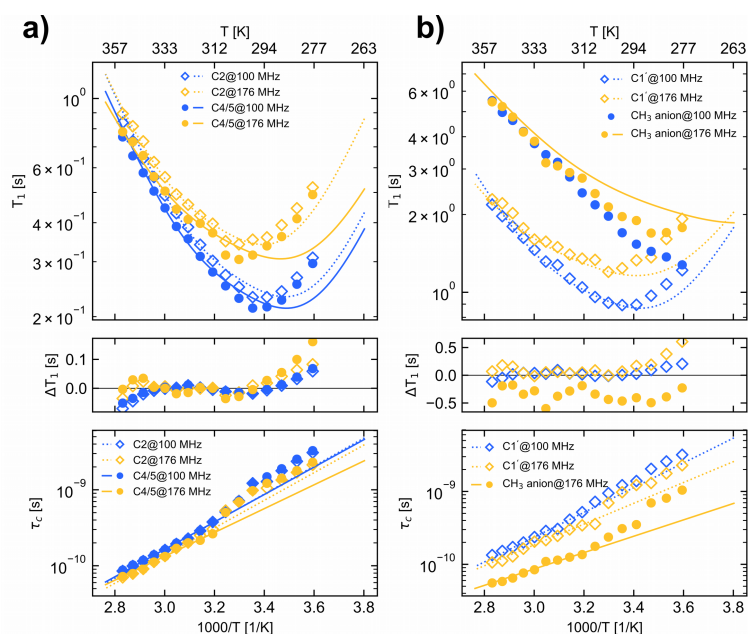

Figure S3:  $^{13}\text{C}$  longitudinal relaxation times (upper panels), the difference between measured and fitted relaxation times (middle panel) and the calculated  $\tau_c$  values (lower panel) for carbons in  $[\text{C}_1\text{C}_1\text{IM}][(\text{CH}_3)_2\text{PO}_4]$  as a function of temperature. (a) carbon C2 (open squares and dotted lines) and C4/5 (filled circles and solid lines), (b) carbon C1' (open squares and dotted lines) and  $\text{CH}_3$  carbons of the anion (filled circles and solid lines). For denotation see Fig. 1. Blue and yellow markers represent data measured at  $B_0$  of 9.35 T and 16.45 T corresponding to a  $^{13}\text{C}$  resonance frequency of 100.6 MHz and 176.2 MHz, respectively. The lines in the upper panel represent calculated  $^{13}\text{C}$  relaxation times according the fit parameters given in Tab. S4B. Although no obvious deviation of  $\tau_c$  from the Arrhenius behaviour is visible for all carbons in the applied temperature range, only the range from 313 K to 353 K was used for the Arrhenius approximation.

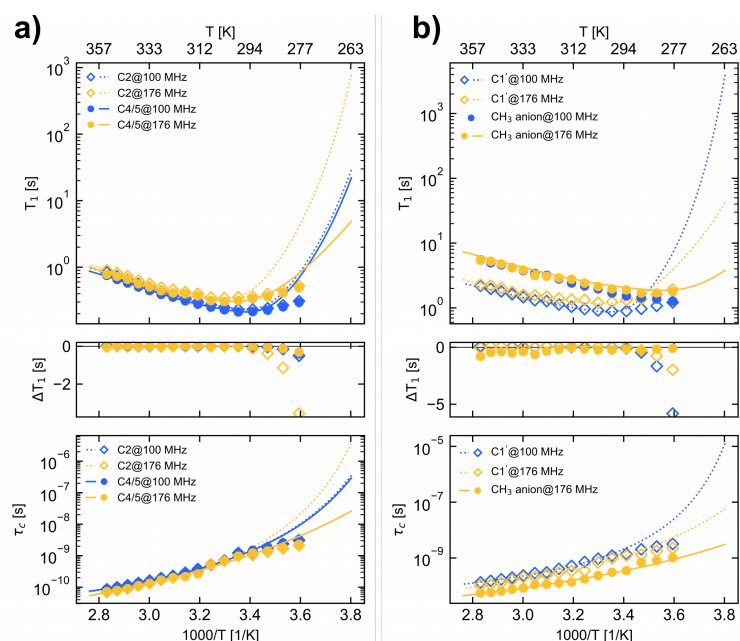

Figure S4:  $^{13}\text{C}$  longitudinal relaxation times (upper panels), the difference between measured and fitted relaxation times (middle panel) and the calculated  $\tau_c$  values (lower panel) for carbons in  $[\text{C}_1\text{C}_1\text{IM}][(\text{CH}_3)_2\text{PO}_4]$  as a function of temperature. (a) carbon C2 (open squares and dotted lines) and C4/5 (filled circles and solid lines), (b) carbon C1' (open squares and dotted lines) and  $\text{CH}_3$  carbons of the anion (filled circles and solid lines). For denotation see Fig. 1. Blue and yellow markers represent data measured at  $B_0$  of 9.35 T and 16.45 T corresponding to a  $^{13}\text{C}$  resonance frequency of 100.6 MHz and 176.2 MHz, respectively. The lines in the upper panel represent calculated  $^{13}\text{C}$  relaxation times according the fit parameters given in Tab. S4C.

## $\{^1\text{H}\}$ - $^{13}\text{C}$ NOE enhancement

Table S5: Comparison of  $\{^1\text{H}\}$ - $^{13}\text{C}$  NOE enhancement  $\eta$  of  $[\text{C}_1\text{C}_1\text{IM}][(\text{CH}_3)_2\text{PO}_4]$  at different temperatures, magnetic field strengths (9.35 T and 16.45 T corresponding to a  $^{13}\text{C}$  resonance frequency of 100.6 MHz and 176.2 MHz, respectively) and probe settings. Spinning rate for HR-MAS conditions was 6 kHz.

|                       | 100 MHz      |              | 176 MHz      |              |
|-----------------------|--------------|--------------|--------------|--------------|
|                       | HR-MAS probe | liquid probe | HR-MAS probe | liquid probe |
| C2                    |              |              |              |              |
| 278.2 K               | 0.47         | 0.32         | 0.26         | 0.30         |
| 293.2 K               | 0.48         | 0.46         | 0.31         | 0.26         |
| 323.2 K               | 1.01         | 1.32         | 1.06         | 0.84         |
| C4/5                  |              |              |              |              |
| 278.2 K               | 0.31         | 0.31         | 0.41         | 0.24         |
| 293.2 K               | 0.58         | 0.43         | 0.39         | 0.28         |
| 323.2 K               | 1.08         | 1.35         | 1.13         | 0.77         |
| C1'                   |              |              |              |              |
| 278.2 K               | 0.58         | 0.50         | 0.67         | 0.50         |
| 293.2 K               | 0.55         | 0.57         | 0.49         | 0.48         |
| 323.2 K               | 1.46         | 1.21         | 1.04         | 0.83         |
| CH <sub>3</sub> anion |              |              |              |              |
| 278.2 K               | 0.89         | 0.69         | 0.76         | 0.59         |
| 293.2 K               | 0.84         | 0.90         | 0.73         | 0.67         |
| 323.2 K               | 1.38         | 1.45         | 1.13         | 1.17         |

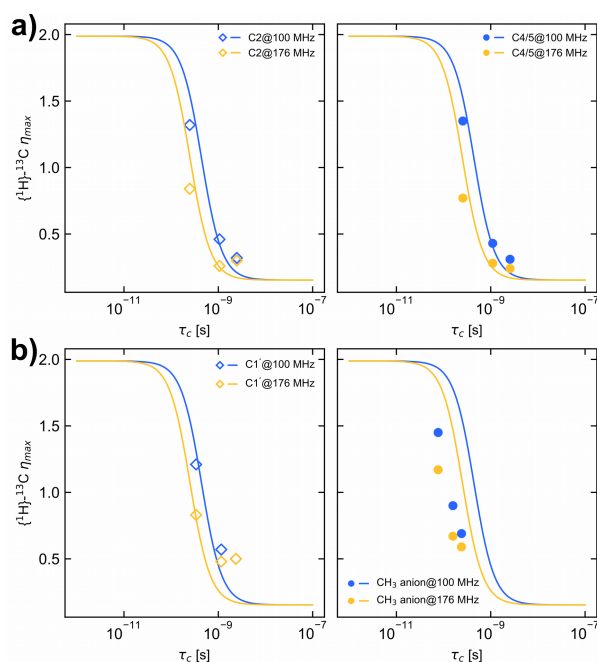

Figure S5: Dependence of maximum  $\{^1\text{H}\}$ - $^{13}\text{C}$  NOE enhancement ( $\eta_{\max}$ ) on  $\tau_c$  calculated for a BPP spectral density function with the fit parameters given in Tab. 1A (solid lines). (a) carbon C2 (left, open squares) and C4/5 (right, filled circles), (b) carbon C1' (left, open squares) and CH<sub>3</sub> carbon of the anion (right, filled circles). Blue and yellow markers represent data measured at  $B_0$  of 9.35 T and 16.45 T corresponding to a  $^{13}\text{C}$  resonance frequency of 100.6 MHz and 176.2 MHz, respectively.

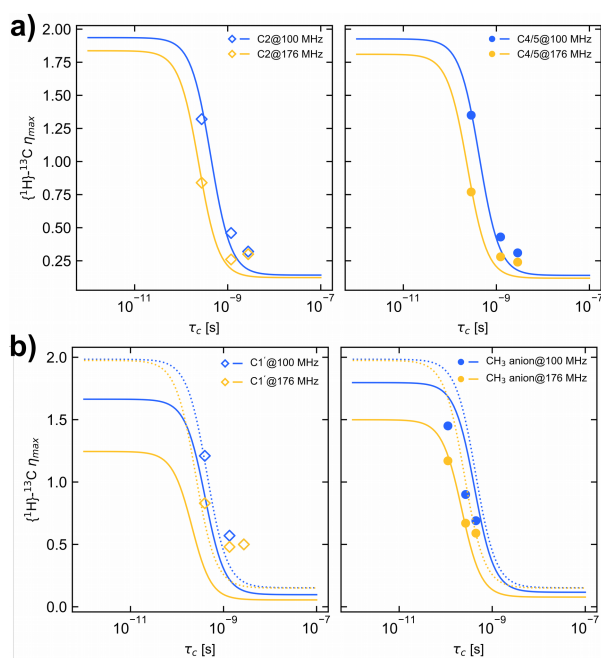

Figure S6: Dependence of maximum  $\{^1\text{H}\}\text{-}^{13}\text{C}$  NOE enhancement ( $\eta_{\text{max}}$ ) on  $\tau_c$  calculated for a BPP spectral density function and considering CSA with the fit parameters given in Tab. 2A (solid lines). (a) carbon C2 (left, open squares) and C4/5 (right, filled circles), (b) carbon C1' (left, open squares) and  $\text{CH}_3$  carbon of the anion (right, filled circles). Dashed lines in (b) are calculated with the fit parameters given in Tab. 2A but a CSA value of 30 ppm. Blue and yellow markers represent data measured at  $B_0$  of 9.35 T and 16.45 T corresponding to a  $^{13}\text{C}$  resonance frequency of 100.6 MHz and 176.2 MHz, respectively.

## Diffusion study

Table S6: Self-diffusion coefficients of  $[\text{C}_1\text{C}_1\text{IM}][(\text{CH}_3)_2\text{PO}_4]$  as a function of temperature

|         | $D$ ( $\text{m}^2/\text{s}$ ) |          |          |                                             |                     |
|---------|-------------------------------|----------|----------|---------------------------------------------|---------------------|
|         | C2                            | C4/5     | C1'      | $\text{O}[\text{C}_1\text{C}_1\text{IM}]^+$ | anion $\text{CH}_3$ |
| 278.2 K | 3.93e-12                      | 4.07e-12 | 4.09e-12 | 4.03±0.07e-12                               | 3.83e-12            |
| 283.2 K | 4.59e-12                      | 4.58e-12 | 4.59e-12 | 4.58±0.01e-12                               | 4.31e-12            |
| 288.2 K | 5.77e-12                      | 5.85e-12 | 5.76e-12 | 5.79±0.04e-12                               | 5.35e-12            |
| 293.2 K | 7.51e-12                      | 7.53e-12 | 7.49e-12 | 7.51±0.02e-12                               | 6.59e-12            |
| 298.2 K | 9.90e-12                      | 9.92e-12 | 9.87e-12 | 9.89±0.02e-12                               | 8.18e-12            |
| 303.2 K | 1.40e-11                      | 1.38e-11 | 1.39e-11 | 1.39±0.01e-11                               | 1.03e-11            |
| 308.2 K | 1.81e-11                      | 1.82e-11 | 1.80e-11 | 1.81±0.01e-11                               | 1.28e-11            |
| 313.2 K | 2.58e-11                      | 2.58e-11 | 2.54e-11 | 2.57±0.02e-11                               | 1.80e-11            |
| 318.2 K | 2.98e-11                      | 2.99e-11 | 2.93e-11 | 2.97±0.03e-11                               | 1.96e-11            |
| 323.2 K | 3.80e-11                      | 3.84e-11 | 3.78e-11 | 3.81±0.03e-11                               | 2.52e-11            |
| 328.2 K | 4.68e-11                      | 4.65e-11 | 4.59e-11 | 4.64±0.04e-11                               | 3.09e-11            |
| 333.2 K | 6.26e-11                      | 6.03e-11 | 6.19e-11 | 6.16±0.09e-11                               | 4.35e-11            |
| 338.2 K | 7.53e-11                      | 7.44e-11 | 7.27e-11 | 7.41±0.11e-11                               | 4.97e-11            |
| 343.2 K | 8.75e-11                      | 8.72e-11 | 8.50e-11 | 8.66±0.11e-11                               | 6.05e-11            |
| 348.2 K | 1.05e-10                      | 1.05e-10 | 1.01e-10 | 1.03±0.02e-10                               | 0.72e-10            |
| 353.2 K | 1.19e-10                      | 1.17e-10 | 1.16e-10 | 1.17±0.01e-10                               | 0.79e-10            |

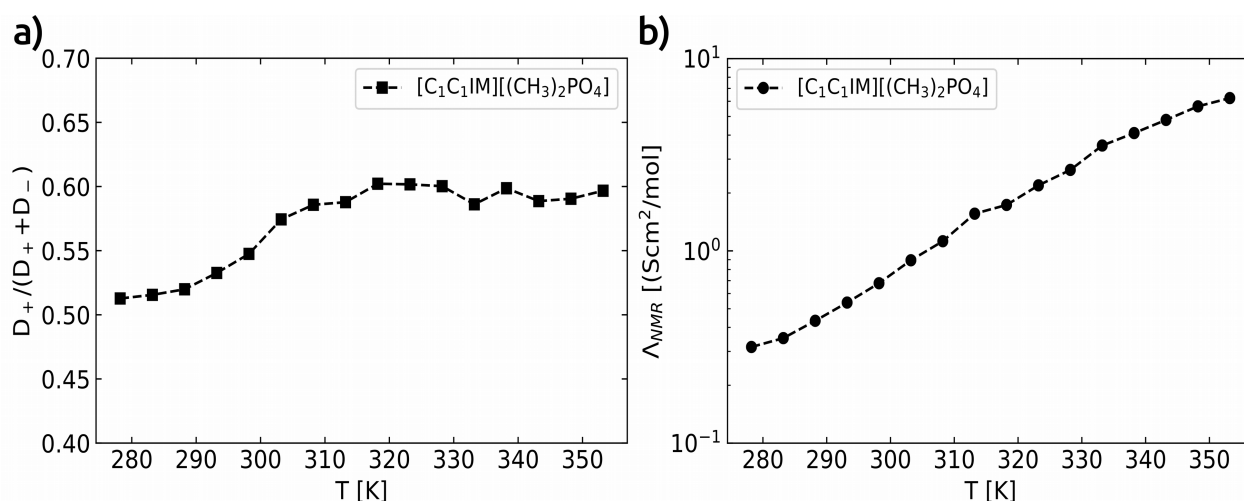

Figure S7: The apparent cationic transference number (a) and the predicted molar conductivity (b) derived from the self-diffusion coefficients of  $[C_1C_1IM][(CH_3)_2PO_4]$  are plotted as a function of temperature<sup>2-4</sup>. The apparent cationic transfer number is calculated on basis of cationic and anionic diffusion coefficients ( $D_+/(D_++D_-)$ ). The molar molar conductivity,  $\Lambda_{NMR}$ , is calculated according to the Nernst-Einstein equation ( $\Lambda_{NMR} = F^2(D_{[C_1C_1IM]^+} + D_{[(CH_3)_2PO_4]^-})/RT$ ,  $F$ : Faraday constant,  $D$ : cationic and anionic diffusion coefficient,  $R$ : universal gas constant,  $T$ : temperature) taking account of cationic and anionic diffusion coefficients.

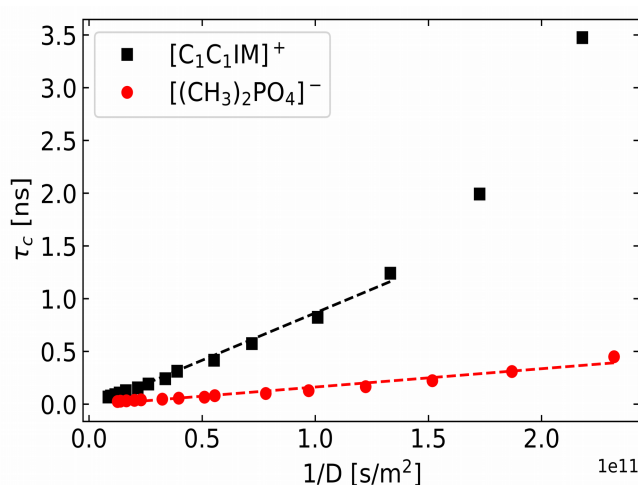

Figure S8:  $^{13}C$  correlation times  $\tau_c$  [ns] plotted as function of the inverse self-diffusion coefficients  $D$  [ $s/m^2$ ] for  $[C_1C_1IM]^+$  (black squares) and  $[(CH_3)_2PO_4]^-$  (red circles) from 278.2 K to 353.2 K. Dashed lines show fits according to  $\tau_c = (2r^2/9cD) + \tau_0$ . The constant  $c$  was set to 2/3 and the slope provides information about the hydrodynamic radius  $r$ . For  $[C_1C_1IM]^+$   $r_{cation} = 1.64 \pm 0.03$  Å and for  $[(CH_3)_2PO_4]^-$   $r_{anion} = 0.72 \pm 0.02$  Å, respectively.

## References

- 1 V. V. Matveev, D. A. Markelov, E. A. Brui, V. I. Chizhik, P. Ingman and E. Lähderanta, 13C NMR relaxation and reorientation dynamics in imidazolium-based ionic liquids: revising interpretation., *Phys. Chem. Chem. Phys.*, 2014, **16**, 10480–4.
- 2 H. Tokuda, K. Hayamizu, K. Ishii, M. A. B. H. Susan and M. Watanabe, Physicochemical properties and structures of room temperature ionic liquids. 1. Variation of anionic species, *J. Phys. Chem. B*, 2004, **108**, 16593–16600.
- 3 H. Tokuda, K. Hayamizu, K. Ishii, M. A. B. H. Susan and M. Watanabe, Physicochemical properties and structures of room temperature ionic liquids. 2. variation of alkyl chain length in imidazolium cation, *J. Phys. Chem. B*, 2005, **109**, 6103–6110.
- 4 H. Tokuda, K. Ishii, M. A. B. H. Susan, S. Tsuzuki, K. Hayamizu and M. Watanabe, Physicochemical properties and structures of room-temperature ionic liquids. 3. Variation of cationic structures, *J. Phys. Chem. B*, 2006, **110**, 2833–2839.
